# Supplementary material for: Fiber formation in water by a mono-urea dicarboxylic acidElectronic supplementary information (ESI) available: IR spectra and XRD patterns of 1c. See http://www.rsc.org/suppdata/cc/b3/b306351h/
Source: Royal Society of Chemistry journal article supplement (doi:10.1039/b306351h), 2003-01-01
Supplement: b306351h.pdf [file b306351h.pdf]

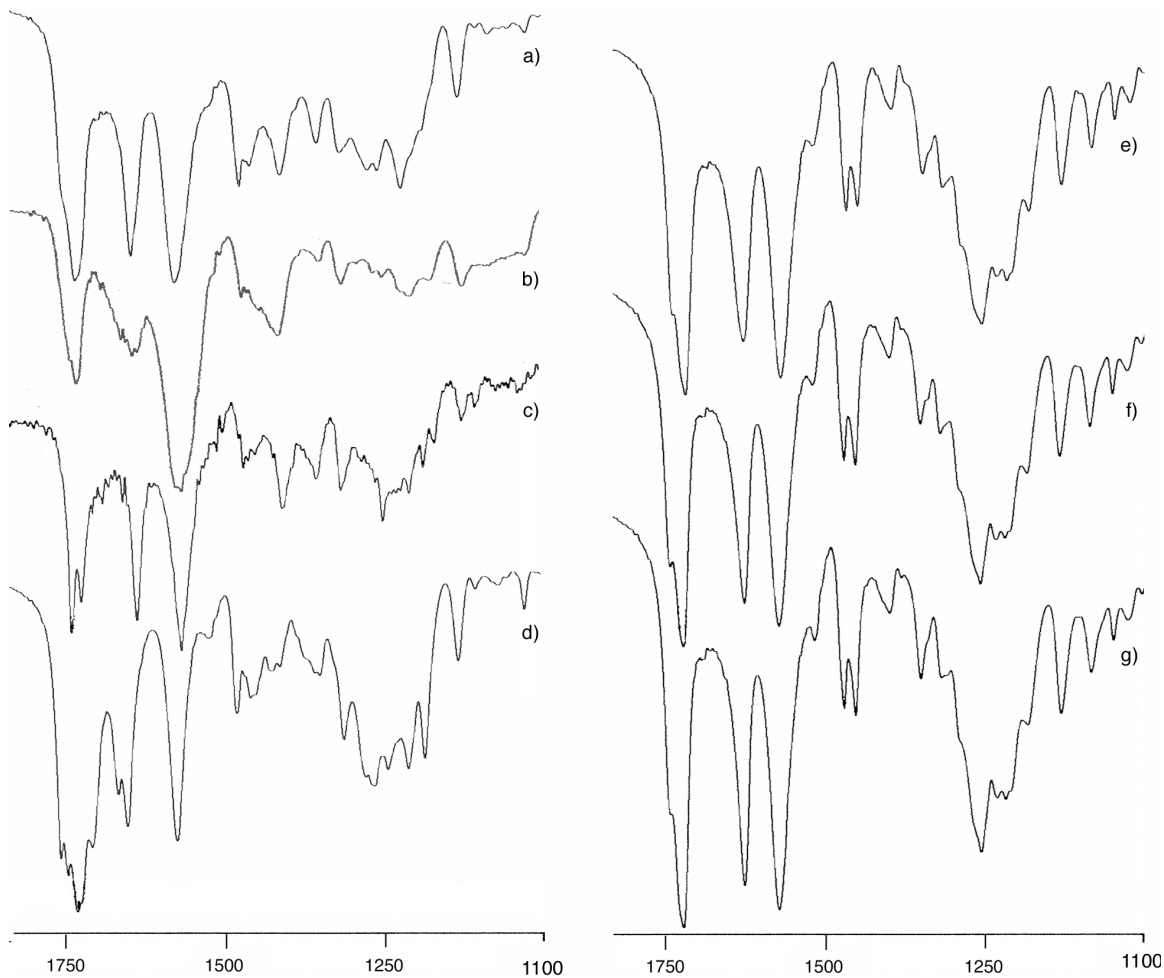

**Figure S.1** IR spectra of the fibrous precipitates of **1c** from Tris buffer in the presence of: a)  $\text{NH}_4^+$ , pH 7.6, b)  $\text{Na}^+$ , pH 8.8, c)  $\text{Na}^+$ , pH 7.6, d) organic solvents, e)  $\text{K}^+$ , pH 7.6, f)  $\text{Rb}^+$ , pH 7.6, g)  $\text{Cs}^+$ , pH 7.6. All samples were prepared as KBr pellets.

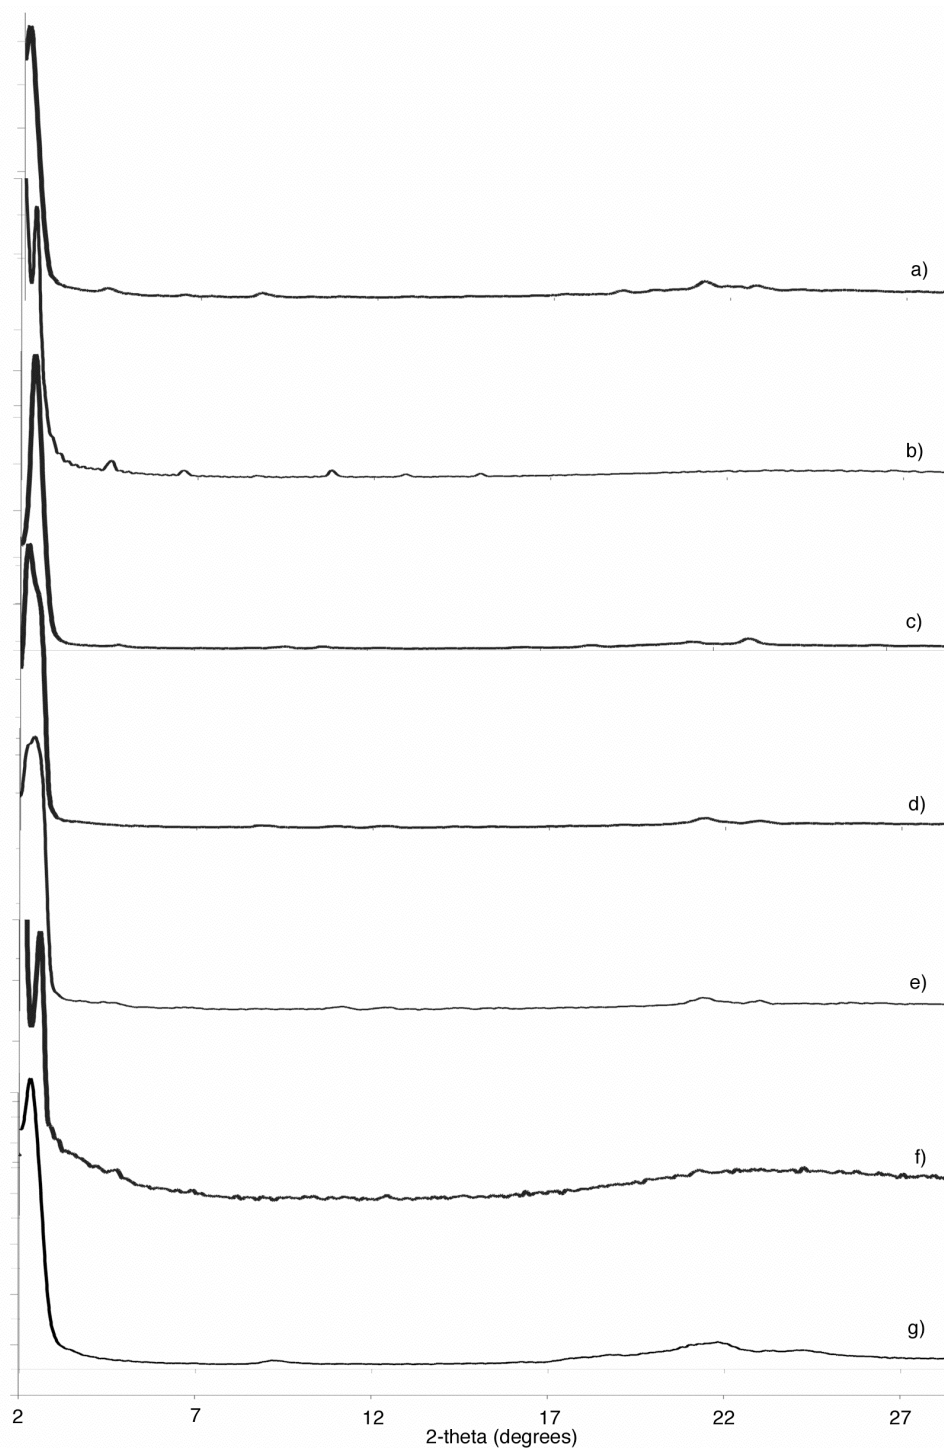

**Figure S.2** XRD patterns of the fibrous precipitates of **1c** formed in the presence of a)  $\text{NH}_4^+$ , pH 7.6, b)  $\text{Na}^+$ , pH 8.8, c)  $\text{Na}^+$ , pH 7.6, d)  $\text{K}^+$ , pH 7.6, e)  $\text{Rb}^+$ , pH 7.6, f)  $\text{Cs}^+$ , pH 7.6, g) and organic solvents (methanol/chloroform).
